# Supplementary material for: Maintenance of phosphate homeostasis and root development are coordinately regulated by MYB1, an R2R3-type MYB transcription factor in rice
Source: PubMed Central journal article supplement (PMC5853628; doi:10.1093/jxb/erx174), 2017-05-26
Supplement: erx174_suppl_supplementary_figures_s1_s3_tables_s1_s3.pdf [file erx174_suppl_supplementary_figures_s1_s3_tables_s1_s3.pdf]

## Supplementary Data

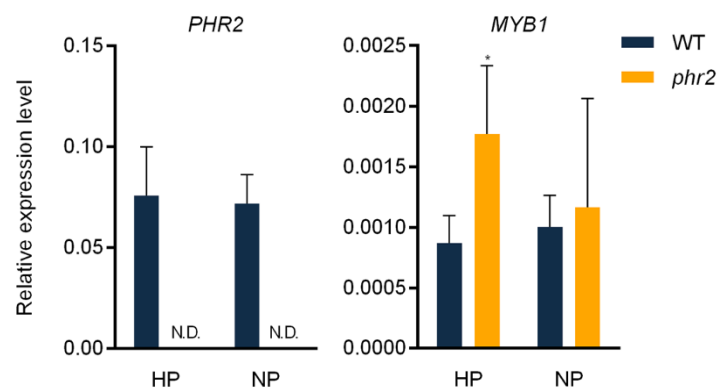

**Fig. S1.** Expression of *OsMYB1* in *osphr2* mutants. Rice seeds were germinated in deionized H<sub>2</sub>O and supplied with (HP) or without (NP) phosphate. RT-qPCR analysis was performed using the rice housekeeping gene *OsActin1* (LOC\_Os03g50885) as an internal control. The values presented are means of three biological replicates. Error bars indicate SD. \*  $P < 0.05$  (Student's *t*-test).

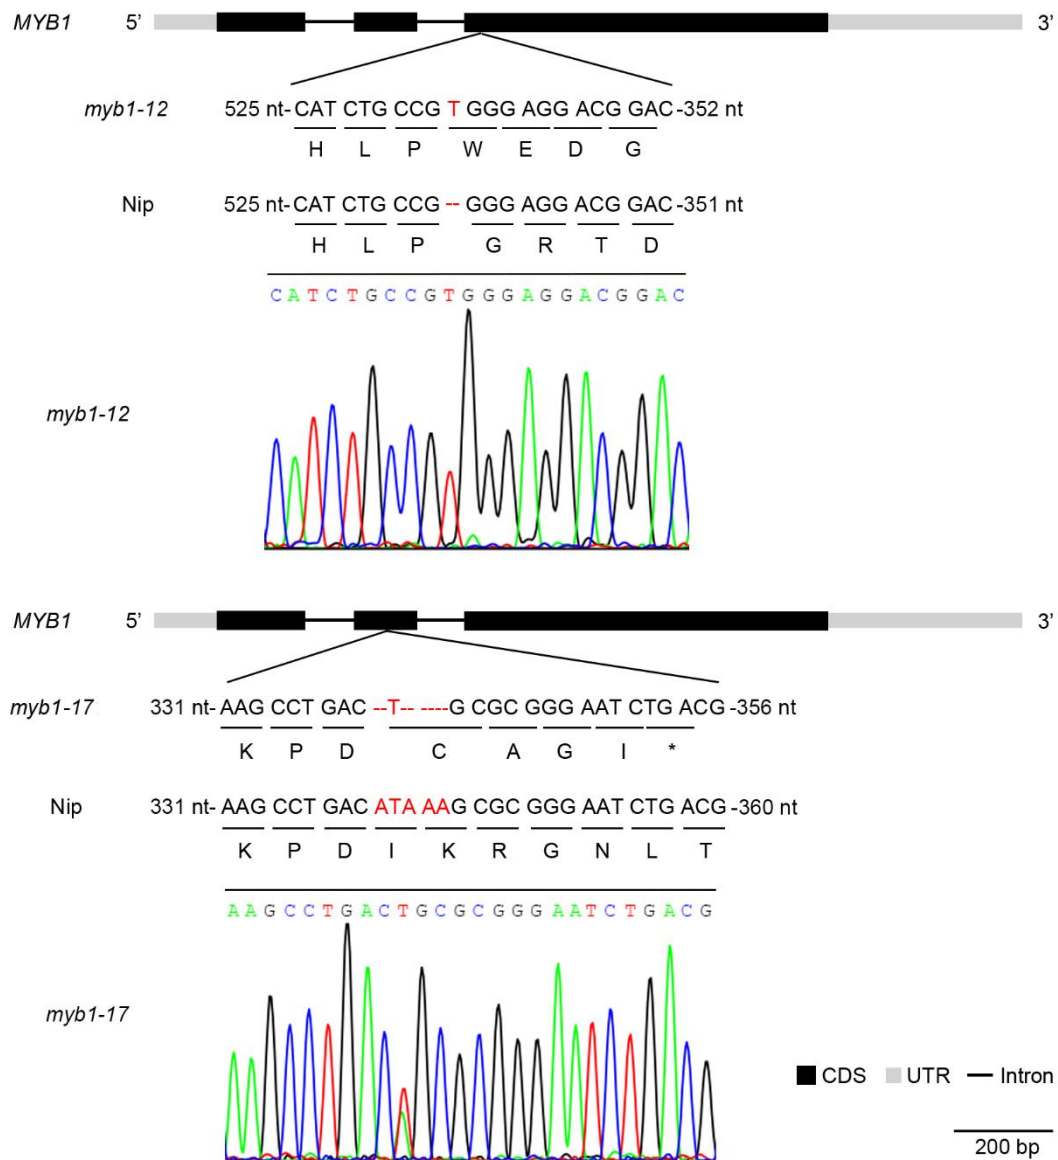

**Fig. S2.** Identification of *myb1* mutant lines. The gene structure of *OsMYB1* along with the mutation sites of three independent lines are present in each panel (upper, middle and lower). The coding sequences (CDS), the untranslated regions (UTR) and the introns are indicated by black boxes, grey boxes and black bars, respectively. The red letters indicate newly generated sequences by the CRISPR-Cas9 system. The letters underlying the nucleotide sequences are amino acid sequences.

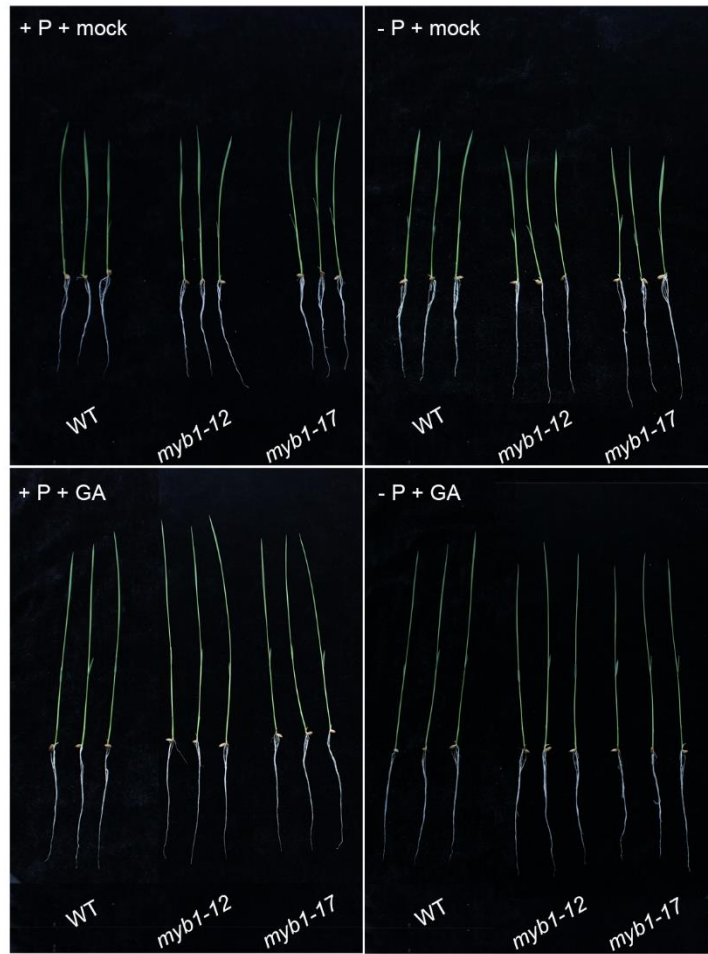

**Fig. S3.** The phenotype of *myb1* mutants and wild-type plants in response to phosphate starvation and exogenous gibberellic acid. The seedlings used for root trait study in Figure 8 were photographed for phenotypic observation. Scale bar = 2 cm.

**Table S1. Primers used for constructs for subcellular localization and yeast-two-hybrid**

| Primer name                         | Sequence(5' to 3')            | Note  | Construct      |
|-------------------------------------|-------------------------------|-------|----------------|
| <b>For subcellular localization</b> |                               |       |                |
| MYB-GFP_F                           | TTagatctATGTCGCAGAGGAGAGTTGCA | BglII | pSAT6A-EGFP-N1 |
| MYB-GFP_R                           | TTcccgggGATTCCTCCTCCCCACTCGC  | SmaI  |                |
| <b>For Y2H</b>                      |                               |       |                |
| MYB-pBD_F                           | TTgaattcATGTCGCAGAGGAGAGTTGCA | EcoRI | pBD-GAL4 Cam   |
| MYB-pBD_R                           | TTcccgggGATTCCTCCTCCCCACTCGC  | SmaI  |                |

**Table S2. Primers used for constructs for generating transgenic plants**

| Primer name                                                                    | Sequence(5' to 3')            | Note          | Construct       |
|--------------------------------------------------------------------------------|-------------------------------|---------------|-----------------|
| <b>For promoter-<i>GUS</i> expression constructs of <i>MYB108</i></b>          |                               |               |                 |
| MYB-pro_F                                                                      | TTggatccATGGCTTAGGCTTTATTCGAT | <i>Bam</i> HI | pCAMBIA-1300-GN |
| MYB-pro_R                                                                      | TTggtaccTGCTGTCTACTAACCTTTGC  | <i>Kpn</i> I  |                 |
| <b>For CRISPR/Cas9 mutation of <i>MYB108</i> and identification of mutants</b> |                               |               |                 |
| MYB-SP1_F                                                                      | GGCATTGTCTTCCTCGAGGGTCCA      |               | pOs-sgRNA       |
| MYB-SP1_R                                                                      | AAACTGGACCCTCGAGGAAGACAA      |               |                 |
| MYB-SP2_F                                                                      | GGCACTCAAGCCTGACATAAAGCG      |               |                 |
| MYB-SP2_R                                                                      | AAACCGCTTTATGTCAGGCTTGAG      |               |                 |
| MYB-SP3_F                                                                      | GGCATAGCGCAGCATCTGCCGGGG      |               |                 |
| MYB-SP3_R                                                                      | AAACCCCGGCAGATGCTGCGCTA       |               |                 |
| Cas9-PCR_F                                                                     | ACAAGGGCAGGGATTTTCG           |               |                 |
| Cas9-PCR_R                                                                     | ACTGGTGGATGAGGGTGCC           |               |                 |
| MYB-PCR_F                                                                      | GATTCCTCCTCCCCACTCGC          |               |                 |
| MYB-PCR_R                                                                      | CATCTGCTGGTCCCATCTCA          |               |                 |

**Table S3. Primers used for RT-qPCR analysis**

| Primers        | Sequence(5' to 3')            | Amplicon/bp |
|----------------|-------------------------------|-------------|
| Actin_qRT_F    | GAGTCTGGCCCATCCATTGT          |             |
| Actin_qRT_R    | AGCATTCTTGGGTCCGAAGA          | 60          |
| MYB108_qRT_F   | GCTACGTATCCAGCTGAGCTTAGC      |             |
| MYB108_qRT_R   | CGCTTTAATGGAGAGACATCACA       | 107         |
| PHT1;1_qRT_F   | CGCTTCCGTACGAGTGGTAGT         |             |
| PHT1;1_qRT_R   | GGTTCTTTCAAATCCAGGGAAA        | 146         |
| PHT1;2_qRT_F   | GACGAGACCGCCCAAGAAG           |             |
| PHT1;2_qRT_R   | TTTTCAGTCACTCACGTCGAGAC       | 74          |
| PHT1;4_qRT_F   | TATTGCGGCTTAGATTGCATTAG       |             |
| PHT1;4_qRT_R   | TCCAAATCAAATGGGCACTAAG        | 72          |
| PHT1;6_qRT_F   | TATAACTGATCGATCGAGACCAGAG     |             |
| PHT1;6_qRT_R   | TGGATAGCCAGGCCAGTTATATATC     | 76          |
| PHT1;8_qRT_F   | AGAAGGCAAAAGAAATGTGTGTTAAAT   |             |
| PHT1;8_qRT_R   | AAAATGTATTTCGTGCCAAATTGCT     | 114         |
| PHT1;9_qRT_F   | AGAAAAACATAGGCTTGTATCCTTT     |             |
| PHT1;9_qRT_R   | AAAACCTAAGAAGCACTGTAAATAAATCC | 80          |
| PHT1;10_qRT_F  | ATGTCGCCCATCCTTCCA            |             |
| PHT1;10_qRT_R  | TCGCTTTCCGACGATGATC           | 63          |
| IPS1_qRT_F     | TTGGCAATTATTCGGTGGAT          |             |
| IPS1_qRT_R     | ACCATTTACCATCCTCTTTATG        | 115         |
| miR399j_qRT_F  | GGAGCATGTGAAGTCTTTTGTAGC      |             |
| miR399j_qRT_R  | GGCAACTCTCCTTTGGCAGA          |             |
| PHO2.1_qRT_F   | CGAGGAGGCGGGACATG             |             |
| PHO2.1_qRT_R   | GATCGACAGGAAGGTGC             | 308         |
| CPS1_qRT_F     | GCTGTTACTATGCTGCCAATTGC       |             |
| CPS1_qRT_R     | GCTCAAAAATCACTTCAGAAATGTG     | 69          |
| KS1_qRT_F      | GGCTCTATTTTGTCCGGCAAT         |             |
| KS1_qRT_R      | GCTCGTTGCTGATATCCCTGAT        | 66          |
| KAO_qRT_F      | CACCAAAGTTTCCGATGAACAC        |             |
| KAO_qRT_R      | CTGGCTGTTTTCCGTTCCA           | 64          |
| KO2_qRT_F      | GCTCCACCCGCTTCATGT            |             |
| KO2_qRT_R      | GCTTCCAATGAATATAATGGTTCACA    | 67          |
| GA20-ox2_qRT_F | GCCGCCTTCCAATTTTGG            |             |
| GA20-ox2_qRT_R | GTACGTTTTGCTTCTTCTTGCAATAT    | 67          |
| GA3-ox2_qRT_F  | TGGAGGAGTTTCAACAAGGAGATG      |             |
| GA3-ox2_qRT_R  | GCGCCCTCAAGAACAACCT           | 66          |
| GA2-ox3_qRT_F  | AGCCAGGTTGGATGGATAGCTA        |             |
| GA2-ox3_qRT_R  | GAGCCACCTCACACACA             | 67          |
